# Supplementary material
Source: PubMed Central journal article supplement (PMC3101282)
Supplement: NIHMS294579-supplement-1.pdf [file NIHMS294579-supplement-1.pdf]

# SUPPLEMENTAL MATERIAL

## Supplemental Figures and Figure Legends

**Duration of sympathetic discharge episodes**

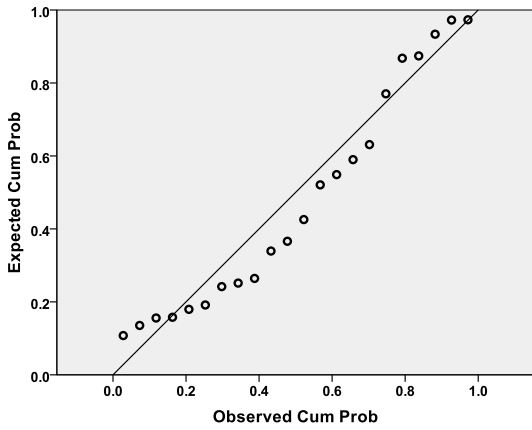

**Integrated SGNA values**

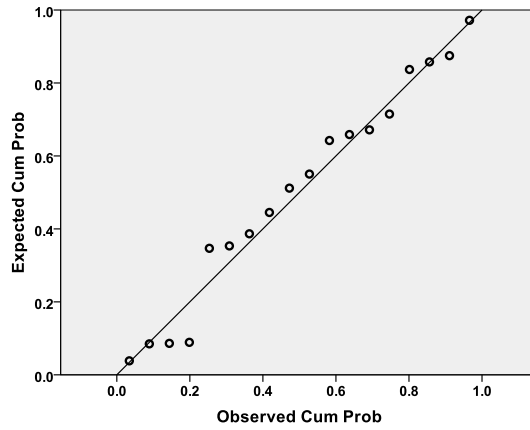

**SGNA-induced HR acceleration values**

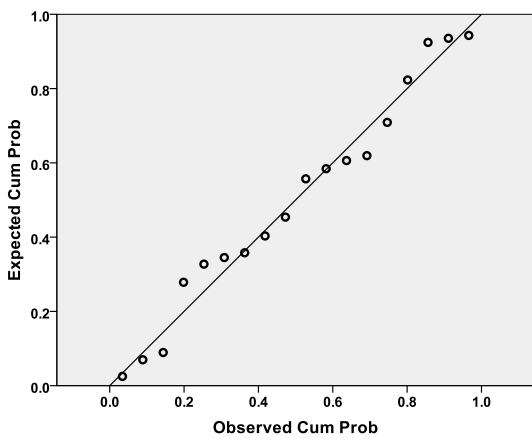

**TH-positive nerve density**

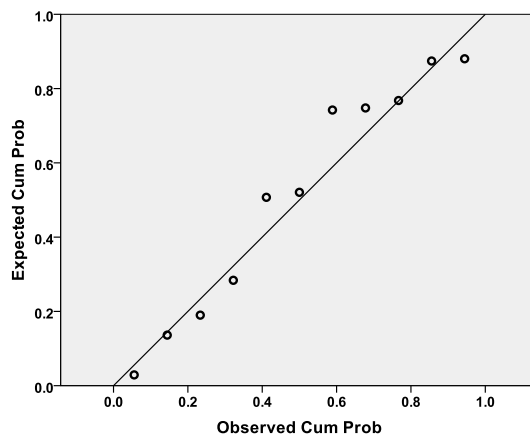

**Supplemental Figure 1.** Probability-probability plots (P-P plots) of main variables used in the study. The diagonal line fits the data points well, indicating no strong violation of normality.

These findings indicate that the main variables are normally distributed. SGNA, stellate ganglion nerve activities. HR, heart rate. TH, tyrosine hydroxylase.

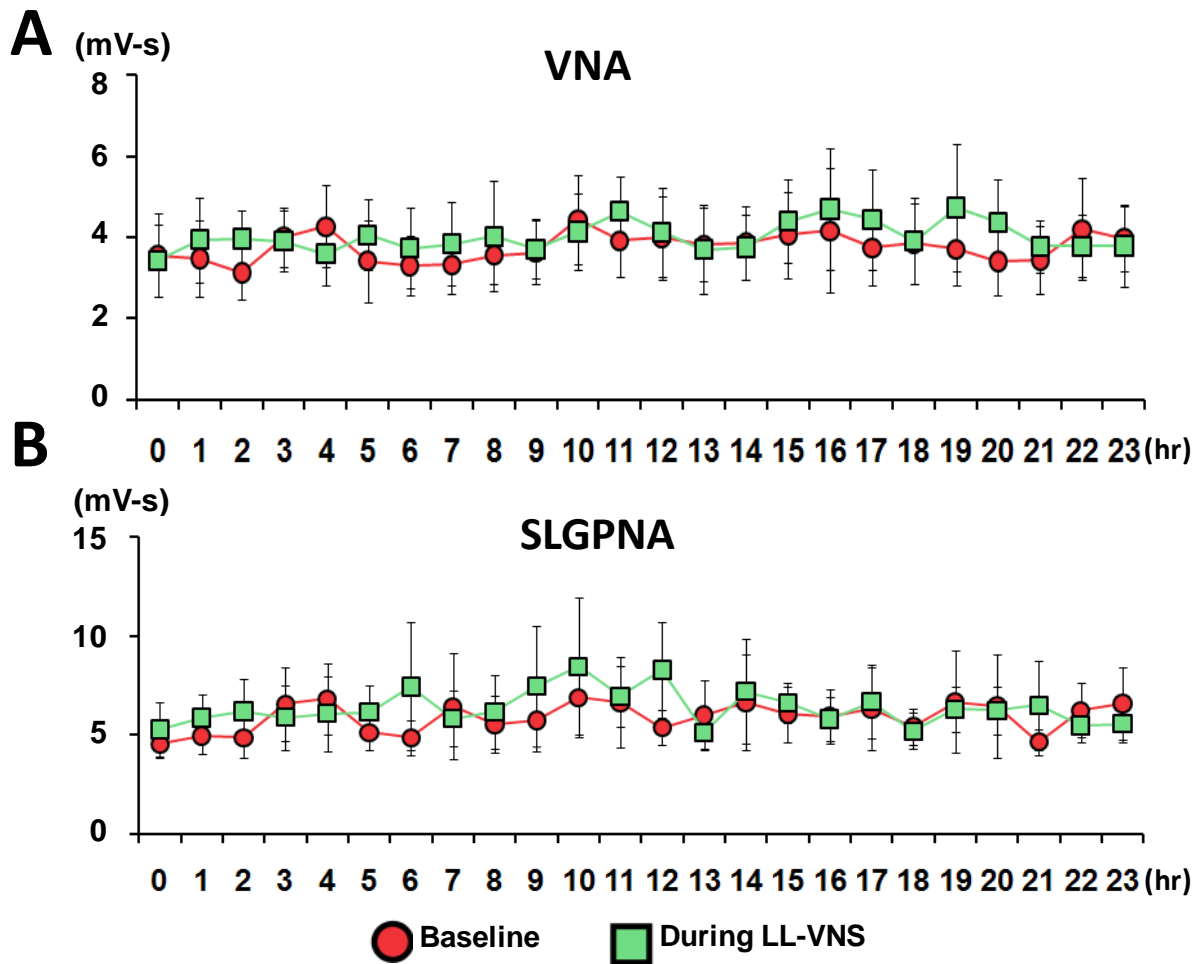

**Supplemental Figure 2.** Effects of LL-VNS on VNA and SLGPNA. A, Hourly averaged VNA did not show a significant difference in any hour of the 24-hr period. B, Hourly averaged SLGPNA did not show a significant difference in any hour of the 24-hr period, either.

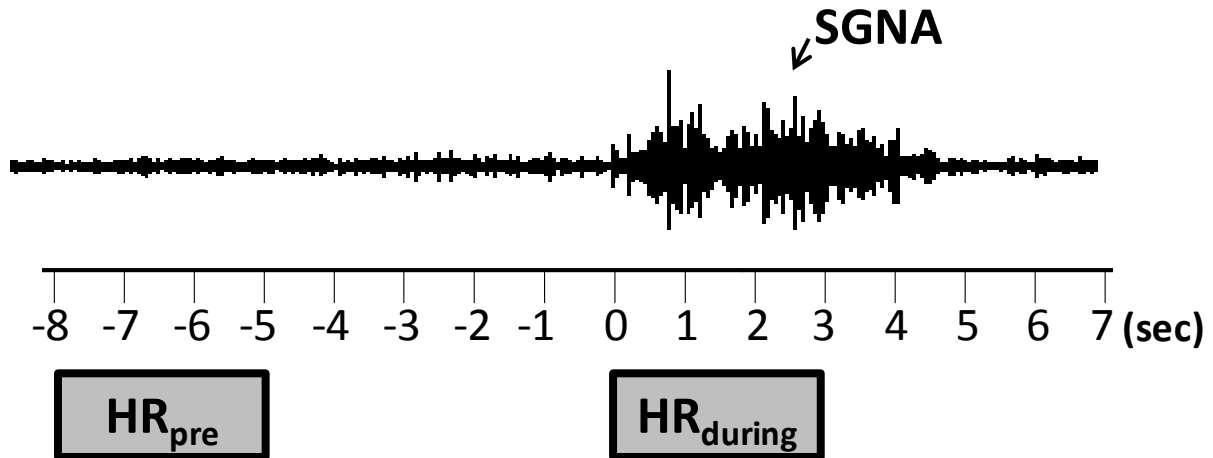

**Supplemental Figure 3.** Methods of heart rate (HR) calculation. The heart rate response to stellate ganglion nerve activity (SGNA) was determined by comparing the average heart rate at 5-8 sec before the onset of the sympathetic discharge ( $HR_{pre}$ ) with that within 3 sec after the onset of sympathetic discharges ( $HR_{during}$ ).
